# Supplementary material
Source: PubMed Central journal article supplement (PMC1617160)
Supplement: rsbl20050311s05.pdf [file rsbl20050311s05.pdf]

# ELECTRONIC APPENDIX

This is the Electronic Appendix to the article

**Does metabolic rate at rest and during flight scale with body mass in insects?**

by

Jeremy E. Niven and Jörn P.W. Scharlemann

*Biol. Lett.* ([doi:10.1098/rsbl.2005.0311](https://doi.org/10.1098/rsbl.2005.0311))

Electronic appendices are refereed with the text; however, no attempt is made to impose a uniform editorial style on the electronic appendices.

**Electronic appendices to Niven & Scharlemann (2005): Does metabolic rate at rest and during flight scale with body mass in insects?**

**Electronic appendix A – Methods, Raw Data and Statistics**

Several studies have reported that insect RMR may vary between insects that fly and those that do not (Full, 1997; Reinhold 1999; Addo-Bediako *et al.* 2002). Therefore, we restricted our analysis to insect orders in which individual species had been measured both during flight and at rest using similar methods. Values for metabolic rates ( $\text{mm}^3 \text{O}_2$  consumption  $\text{h}^{-1}$ ) or mass-specific metabolic rates ( $\text{mm}^3 \text{O}_2$  consumption  $\text{mg}^{-1} \text{h}^{-1}$ ) and body mass (mg) were compiled from the available literature. The measurements of both RMR and FMR were adjusted to 22°C assuming a Q10 of 2.0 for both resting and flight metabolism (Morgan *et al.* 1985). For a few species, several studies had measured the MR, we took the mean across these studies to prevent these species biasing our analyses. Mass-specific MRs (sRMR and sFMR) were calculated by dividing MR by wet body mass ( $M$ ).

We normalised all data by logarithmic ( $\log_{10}$ ) transformation and fitted functional relationships of the form  $\log_{10}(Y) = \log_{10}(a) + b\log_{10}(M)$ , where  $Y$  is RMR, sRMR, FMR or sFMR. Since both variables (MR and  $M$ ) were subject to error and  $M$  was not under the control of the investigators, Model II regression techniques such as reduced major axis regression (RMA) should be employed (Sokal and Rohlf 1995).

We wanted to investigate whether there was a difference in the functional relationship between FMR or sFMR and body mass for small (<10mg) and large (>10mg) insects using analysis of covariance (ANCOVA). However, Model II regression

techniques have not been developed in ANCOVA (Sokal and Rohlf 1995), therefore, we employed least-squares regression techniques throughout. Further, RMA produced similar scaling relationships to those obtained using least-squares regression (table 3; figure 1). Using ANCOVA we compared three models; (1) allowing for different exponents and intercepts for small and large insects (including interaction of size), (2) fitting the same exponent for both small and large insects, but allowing for different intercepts (additive effect of size) and (3) fitting one intercept and slope for both small and large insects (least-squares regression). We used *t*-tests to determine whether the regression coefficient (*b*) deviated significantly from previously suggested scaling relationships (Sokal and Rohlf 1995).

### **Temperature Correction**

The resting metabolic rates (RMR) and mass-specific RMR of insects were normalized to 22°C, using the Q10 correction for temperature differences. Q10 is the factorial increase in biological process, in this case RMR, with a temperature change of 10°C. The Q10 value of 2 was used because there is empirical evidence that this value is applicable to insects (Morgan *et al.* 1985). Data were transformed using the following equation:

$$\text{RMR}_N = \text{RMR}_E \cdot 10^{(T_N - T_E) \log(Q10)/10}$$

Where  $\text{RMR}_N$  is the RMR at the normalized temperature,  $\text{RMR}_E$  is the RMR measured at the experimental temperature,  $T_N$  is the temperature to which the RMR is normalized and  $T_E$  is the experimental temperature.

**Table 1.** Body mass, temperature at which measurements were performed, and temperature normalized resting metabolic rate (RMR) and mass-specific RMR (sRMR) of insect species from the literature.

| Order       | Species                             | Mass (mg) | Temp. (°C) | RMR (mm <sup>3</sup> O <sub>2</sub> h <sup>-1</sup> ) | sRMR (mm <sup>3</sup> O <sub>2</sub> mg <sup>-1</sup> h <sup>-1</sup> ) | Reference                                                                                                   |
|-------------|-------------------------------------|-----------|------------|-------------------------------------------------------|-------------------------------------------------------------------------|-------------------------------------------------------------------------------------------------------------|
| Dictyoptera | <i>Periplaneta americana</i>        | 990.5     | 25         | 300.86                                                | 0.36                                                                    | Poláček and Kubišta (1960)                                                                                  |
|             | <i>Blattella germanica</i>          | 51        | 28.5       | 24.68                                                 | 0.48                                                                    |                                                                                                             |
|             | <i>Blatta orientalis</i>            | 331       | 26         | 90.46                                                 | 0.27                                                                    | Coelho and Moore (1989)                                                                                     |
|             | <i>Nauphoeta cinerea</i>            | 515       | 22.7       | 106.46                                                | 0.21                                                                    |                                                                                                             |
|             | <i>Eublaberus posticus</i>          | 2200      | 25         | 607.56                                                | 0.28                                                                    |                                                                                                             |
|             | <i>Leucophaea maderae</i>           | 2800      | 20         | 418.13                                                | 0.15                                                                    |                                                                                                             |
|             | <i>Gromphodorina chopardi</i>       | 3400      | 25         | 386.63                                                | 0.11                                                                    |                                                                                                             |
|             | <i>Blaberus discoidalis</i>         | 4080      | 25         | 563.38                                                | 0.14                                                                    |                                                                                                             |
|             | <i>Byrsotria fumagata</i>           | 4950      | 25         | 804.13                                                | 0.16                                                                    |                                                                                                             |
|             | <i>Gromphodorina portentosa</i>     | 5200      | 24         | 860.10                                                | 0.17                                                                    |                                                                                                             |
| Diptera     | <i>Blaberus giganteus</i>           | 5165      | 23         | 1278.93                                               | 0.25                                                                    |                                                                                                             |
|             | <i>Pantophthalmus tabaninus</i>     | 1764      | 25         | 472.83                                                | 0.27                                                                    |                                                                                                             |
|             | <i>Aedes campestris</i>             | 6.72      | 17.5       | 41.90                                                 | 6.23                                                                    | Bartholomew and Lighton (1986)                                                                              |
|             | <i>Drosophila repleta</i>           | 3.28      | 25         | 13.32                                                 | 1.67                                                                    |                                                                                                             |
|             | <i>D. americana</i>                 | 1.1       | 20         | 1.49                                                  | 1.36                                                                    | Hocking (1953)                                                                                              |
|             | <i>D. virilis</i> <sup>§</sup>      | 1.47      | 20         | 2.60                                                  | 1.77                                                                    |                                                                                                             |
|             | <i>D. melanogaster</i> <sup>§</sup> | 0.93      | 22         | 3.70                                                  | 5.0                                                                     | Chadwick and Gilmour (1940)                                                                                 |
|             | <i>D. nikananu</i>                  | 0.49      | 22         | 1.65                                                  | 3.36                                                                    |                                                                                                             |
|             | <i>D. mimica</i>                    | 2.44      | 22         | 5.61                                                  | 2.3                                                                     | Chadwick (1947)                                                                                             |
|             | <i>Tabanus affinis</i>              | 160       | 18.9       | 158.68                                                | 0.99                                                                    |                                                                                                             |
|             | <i>Simulium venustum</i>            | 2.5       | 20.6       | 12.12                                                 | 4.85                                                                    | Chadwick (1947)/<br>Lehmann <i>et al.</i> (2000) <sup>†</sup>                                               |
|             | <i>Nowickia nitida/rostrata</i>     | 130.4     | 30         | 185.74                                                | 1.42                                                                    |                                                                                                             |
|             | <i>Glaphyropygia dryas</i>          | 20.0      | 24         | 36.21                                                 | 1.81                                                                    | Hocking (1953)/<br>Lehmann <i>et al.</i> (2000) <sup>†</sup>                                                |
|             | <i>Promachus</i>                    | 200.2     | 24         | 202.17                                                | 1.01                                                                    |                                                                                                             |
|             | <i>Musca domestica</i>              | 18        | 25         | 52.63                                                 | 2.92                                                                    | Lehmann <i>et al.</i> (2000) <sup>†</sup>                                                                   |
|             | <i>Phormia regina</i>               | 37.5      | 25         | 96.86                                                 | 2.58                                                                    |                                                                                                             |
| Hemiptera   | <i>Cystosoma saundersii</i>         | 940       | 25         | 458.11                                                | 0.49                                                                    | Chappell and Morgan (1987)                                                                                  |
|             | <i>Fidicina mannifera</i>           | 2838      | 22         | 1560.9                                                | 0.55                                                                    |                                                                                                             |
| Hymenoptera | <i>Apis mellifera</i> <sup>§</sup>  | 101.7     | 22.7       | 326.14                                                | 3.21                                                                    | Morgan (1987)<br>Bartholomew and Barnhart (1984)<br>Jongbloed and Wiersama (1934)/<br>Hocking (1953)/ Rothe |

|                                      |                                           |                        |      |         |        |                                                                                         |
|--------------------------------------|-------------------------------------------|------------------------|------|---------|--------|-----------------------------------------------------------------------------------------|
| Lepidoptera                          | <i>Mimas tiliae</i>                       | 299.4                  | 22.3 | 219.9   | 0.73   | and Nachtigall (1989)<br>Zebe (1954)                                                    |
|                                      | <i>Antheraea pernyi</i>                   | 1064.4                 | 22.2 | 766.31  | 0.72   |                                                                                         |
|                                      | <i>Odonestis pruni</i>                    | 270                    | 21.3 | 175.72  | 0.65   |                                                                                         |
|                                      | <i>Vanessa io</i>                         | 232.5                  | 21.4 | 133.31  | 0.57   |                                                                                         |
|                                      | <i>Metopsilus porcellus</i>               | 285                    | 21.4 | 196.09  | 0.69   |                                                                                         |
|                                      | <i>Bombyx mori</i>                        | 720                    | 23   | 698.66  | 0.97   | Itaya (1940)*                                                                           |
|                                      | <i>Galleria mellonella</i>                | 65                     | 30   | 85.87   | 1.32   |                                                                                         |
|                                      | <i>Manduca corallina</i>                  | 1618.25                | 23   | 498.26  | 0.31   | Bartholomew and<br>Casey (1978)                                                         |
|                                      | <i>Perigonia lusca</i>                    | 547.25                 | 23   | 188.92  | 0.36   |                                                                                         |
|                                      | <i>Enyo ocypete</i>                       | 411                    | 23   | 176.40  | 0.43   |                                                                                         |
|                                      | <i>Xylophanes pluto</i>                   | 828.00                 | 23   | 285.84  | 0.35   |                                                                                         |
|                                      | <i>Automeris jacunda</i>                  | 653.25                 | 23   | 237.71  | 0.36   |                                                                                         |
|                                      | <i>Automeris zugana</i>                   | 488.43                 | 23   | 168.62  | 0.35   |                                                                                         |
|                                      | <i>Eacles imperialis</i>                  | 1105                   | 23   | 556.74  | 0.50   |                                                                                         |
|                                      | <i>Syssphinx molina</i>                   | 1757                   | 23   | 1196.72 | 0.68   |                                                                                         |
|                                      | <i>Adeloneivaia<br/>boisduvalii</i>       | 995.33                 | 23   | 995.33  | 0.28   |                                                                                         |
|                                      | Odonata                                   | <i>Anax junius</i>     | 1019 | 30      | 596.97 | 0.59                                                                                    |
| <i>Brachymesia<br/>simpliciollis</i> |                                           | 344                    | 30   | 223.26  | 0.65   |                                                                                         |
| <i>Erythemis simplicicollis</i>      |                                           | 263                    | 30   | 126.89  | 0.48   |                                                                                         |
| <i>Erythrodiplax berenice</i>        |                                           | 125                    | 30   | 63.18   | 0.51   |                                                                                         |
| <i>Erythrodiplax connata</i>         |                                           | 52                     | 30   | 37.93   | 0.72   |                                                                                         |
| <i>Libellula auripennis</i>          |                                           | 464                    | 30   | 199.87  | 0.43   |                                                                                         |
| <i>Miathyria marcella</i>            |                                           | 171                    | 30   | 149.28  | 0.87   |                                                                                         |
| <i>Pachydiplax<br/>longipennis</i>   |                                           | 186                    | 30   | 101.49  | 0.54   |                                                                                         |
| <i>Pantala flavescens</i>            |                                           | 339                    | 30   | 241.43  | 0.71   |                                                                                         |
| <i>Perithemis tenera</i>             |                                           | 61                     | 30   | 47.65   | 0.78   |                                                                                         |
| Orthoptera                           |                                           | <i>Tramea carolina</i> | 383  | 30      | 257.37 | 0.67                                                                                    |
|                                      | <i>Schistocerca gregaria</i> <sup>§</sup> | 1736.45                | 26.4 | 757.45  | 0.44   | Bodenheimer (1929)/<br>Krogh and Weis-Fogh<br>(1951)<br>Stevens and Josephson<br>(1977) |
|                                      | <i>Neoconcephalus<br/>robustus</i>        | 870                    | 23   | 616.92  | 0.71   |                                                                                         |
|                                      | <i>Euconcephalus nastus</i>               | 650                    | 23   | 169.81  | 0.26   |                                                                                         |
|                                      | <i>Gryllotalpa australis</i>              | 874                    | 23   | 342.50  | 0.39   | Kavanagh (1987)                                                                         |
|                                      | <i>Teleogryllus commodus</i>              | 602                    | 23   | 174.12  | 0.29   |                                                                                         |

\*denotes a reference and data that was obtained from Keister and Buck (1974).

†Measurements of CO<sub>2</sub> production at rest or during flight were converted to O<sub>2</sub> consumption assuming a respiratory quotient of 1.

§Measurements for the same species from several studies were averaged.

**Table 2.** Body mass, temperature at which measurements were performed, and temperature normalized flight metabolic rate (FMR) and mass-specific FMR (sFMR) of insects from the literature.

| Order                     | Species                             | Mass (mg)                    | Temp. (°C) | FMR (mm <sup>3</sup> O <sub>2</sub> h <sup>-1</sup> ) | sFMR (mm <sup>3</sup> O <sub>2</sub> mg <sup>-1</sup> h <sup>-1</sup> ) | Reference                                                     |                                |
|---------------------------|-------------------------------------|------------------------------|------------|-------------------------------------------------------|-------------------------------------------------------------------------|---------------------------------------------------------------|--------------------------------|
| Dictyoptera               | <i>Periplaneta americana</i>        | 1.42                         | 20         | 53828                                                 | 37.91                                                                   | Poláček and Kubišta (1960)                                    |                                |
| Diptera                   | <i>Aedes flavescens</i>             | 3.15                         | 15.56      | 107.80                                                | 34.22                                                                   | Hocking (1953)                                                |                                |
|                           | <i>Aedes nearticus</i>              | 5.77                         | 15         | 193.09                                                | 33.46                                                                   |                                                               |                                |
|                           | <i>Drosophila americana</i>         | 1.25                         | 20         | 34.16                                                 | 27.33                                                                   | Chadwick (1947)                                               |                                |
|                           | <i>D. virilis</i> <sup>§</sup>      | 1.35                         | 20         | 22.52                                                 | 36.59                                                                   | Chadwick (1947)/ Lehmann <i>et al.</i> (2000) <sup>†</sup>    |                                |
|                           | <i>D. repleta</i>                   | 3.28                         | 25         | 56.11                                                 | 17.11                                                                   | Chadwick and Gilmour (1940)                                   |                                |
|                           | <i>D. melanogaster</i> <sup>§</sup> | 0.9                          | 25         | 28.45                                                 | 27.88                                                                   | Hocking (1953)/ Lehmann <i>et al.</i> (2000) <sup>†</sup>     |                                |
|                           | <i>D. nikananu</i>                  | 0.64                         | 22         | 20.90                                                 | 32.65                                                                   | Lehmann <i>et al.</i> (2000) <sup>†</sup>                     |                                |
|                           | <i>D. mimica</i>                    | 3.07                         | 22         | 119.21                                                | 38.83                                                                   |                                                               |                                |
|                           | <i>Lucilia sericata</i>             | 32.55                        | 27         | 2279.08                                               | 70.02                                                                   | Davis and Fraenkel (1940)                                     |                                |
|                           | <i>Nowickia nitida/rostrata</i>     | 130.4                        | 30         | 3984.421                                              | 30.56                                                                   | Chappell and Morgan (1987)                                    |                                |
|                           | <i>Tabanus affinis</i>              | 160                          | 18.9       | 4363.77                                               | 27.27                                                                   | Hocking (1953)                                                |                                |
|                           | <i>Simulium venustum</i>            | 2.5                          | 20.6       | 74.38                                                 | 29.75                                                                   |                                                               |                                |
|                           | Homoptera                           | <i>Glaphyropygia dryas</i>   | 20.0       | 24                                                    | 795.51                                                                  | 39.78                                                         | Morgan <i>et al.</i> (1985)    |
| <i>Promachus</i>          |                                     | 200.2                        | 24         | 9233.58                                               | 46.12                                                                   |                                                               |                                |
| <i>Fidicina mannifera</i> |                                     | 2838                         | 22         | 108922.4                                              | 38.38                                                                   | Bartholomew and Barnhart (1984)                               |                                |
| Hymenoptera               |                                     | <i>Bombus lucorum</i>        | 511.33     | 32                                                    | 15552.1                                                                 | 30.42                                                         | Ellington <i>et al.</i> (1990) |
|                           |                                     | <i>Euglossa dissimula</i>    | 104        | 22                                                    | 13000                                                                   | 125                                                           | Casey <i>et al.</i> (1985)     |
|                           |                                     | <i>Euglossa mandibularis</i> | 90         | 22                                                    | 17460                                                                   | 194                                                           |                                |
|                           |                                     | <i>Euglossa imperialis</i>   | 170        | 22                                                    | 20699.2                                                                 | 121.76                                                        |                                |
|                           |                                     | <i>Euglossa saphirina</i>    | 71         | 22                                                    | 8500.12                                                                 | 119.72                                                        |                                |
|                           |                                     | <i>Exaerete frontalis</i>    | 640        | 22                                                    | 44832                                                                   | 70.05                                                         |                                |
|                           |                                     | <i>Eufriesia pulchra</i>     | 430        | 22                                                    | 41499.3                                                                 | 96.51                                                         |                                |
|                           | <i>Eulaema nigrita</i>              | 400                          | 22         | 53352                                                 | 133.38                                                                  |                                                               |                                |
| <i>E. cingulata</i>       | 550                                 | 22                           | 50077.5    | 91.05                                                 |                                                                         |                                                               |                                |
| <i>E. meriana</i>         | 940                                 | 22                           | 60996.6    | 64.89                                                 |                                                                         |                                                               |                                |
|                           | <i>Apis mellifera</i> <sup>§</sup>  | 94.16                        | 21.73      | 8259.07                                               | 87.72                                                                   | Withers (1981)/ Jongbloed and Wiersama (1934)/ Hocking (1953) |                                |
|                           | <i>Bombus edwardsii</i>             | 400                          | 22         | 31200                                                 | 78                                                                      | Heinrich (1975)                                               |                                |
|                           | <i>Xylocopa californica</i>         | 600                          | 22         | 37800                                                 | 63                                                                      | Chappell (1982)                                               |                                |

|                                           |                                        |         |          |          |       |                              |
|-------------------------------------------|----------------------------------------|---------|----------|----------|-------|------------------------------|
| Lepidoptera                               | <i>Xylocopa capensis</i>               | 1200    | 22       | 63600    | 53    | Nicholson and Louw (1982)    |
|                                           | <i>Hyles euphorbia</i>                 | 650     | 22       | 35945    | 55.3  | Heinrich and Casey (1973)    |
|                                           | <i>Deilephila</i><br><i>elepenor</i>   | 650     | 22       | 38610    | 59.4  |                              |
|                                           | <i>Mimas tiliae</i>                    | 291     | 22.56    | 16237.8  | 55.8  | Zebe (1954)                  |
|                                           | <i>Antheraea pernyi</i>                | 595     | 22.6     | 16780.41 | 28.20 |                              |
|                                           | <i>Odonestis pruni</i>                 | 240     | 20.9     | 16577.13 | 69.07 |                              |
|                                           | <i>Vanessa io</i>                      | 176.25  | 21.625   | 10014.9  | 54.73 |                              |
|                                           | <i>V. polychloros</i>                  | 270     | 22.7     | 18649.27 | 69.07 |                              |
|                                           | <i>Metopsilus</i><br><i>porcellus</i>  | 243.75  | 22.55    | 21026.8  | 86.53 |                              |
|                                           | <i>Deilephila</i><br><i>euphorbiae</i> | 395     | 22.3     | 24759.75 | 62.68 |                              |
|                                           | <i>Aglia tau</i>                       | 112.5   | 21.9     | 7861.81  | 69.88 |                              |
|                                           | <i>Saturnia pavonia</i>                | 198.33  | 21.43    | 16850.38 | 84.96 |                              |
|                                           | <i>Cucullia lactucae</i>               | 285     | 22.6     | 7873.64  | 27.63 |                              |
|                                           | <i>Plusia gamma</i>                    | 120     | 23.4     | 4622.90  | 38.52 |                              |
|                                           | <i>Agrotis</i><br><i>exclaationis</i>  | 200     | 23.7     | 8248.46  | 41.24 |                              |
|                                           | <i>A. pronuba</i>                      | 273.33  | 22.07    | 11769.74 | 43.06 |                              |
|                                           | <i>Manduca corallina</i>               | 1618.25 | 23       |          | 64.78 | Bartholomew and Casey (1978) |
|                                           | <i>Protambulyx</i><br><i>strigilis</i> | 1095.33 | 23       | 62299.84 | 56.88 |                              |
|                                           | <i>Perigonia lusca</i>                 | 547.25  | 23       | 25310.56 | 46.25 |                              |
|                                           | <i>Enyo ocypete</i>                    | 411     | 23       | 34957.72 | 85.06 |                              |
|                                           | <i>Xylophanes pluto</i>                | 828.00  | 23       | 51204.7  | 61.84 |                              |
|                                           | <i>Automeris jacunda</i>               | 653.25  | 23       | 26074.57 | 39.92 |                              |
|                                           | <i>Automeris zugana</i>                | 488.43  | 23       | 25101.13 | 51.39 |                              |
| <i>Eacles imperialis</i>                  | 1105                                   | 23      | 50116.98 | 45.35    |       |                              |
| <i>Syssphinx molina</i>                   | 1757                                   | 23      | 105507.9 | 60.05    |       |                              |
| <i>Adeloneivaia</i><br><i>boisduvalii</i> | 995.33                                 | 23      | 35809.74 | 35.98    |       |                              |
| Orthoptera                                | <i>Schistocerca</i><br><i>gregaria</i> | 1960    | 27.6     | 21404.5  | 10.92 | Krogh and Weis-Fogh (1951)   |

<sup>†</sup>Measurements of CO<sub>2</sub> production at rest or during flight were converted to O<sub>2</sub> consumption assuming a respiratory quotient of 1.

<sup>§</sup>Measurements for the same species from several studies were averaged.

**Table 3.** Scaling relationships of resting (RMR) and flight metabolic rate (FMR). Slopes and intercepts  $\pm$  s.e. are given for reduced major axis regression (RMA) and ordinary least-squares regression. Analyses of Covariance (ANCOVA) for FMR allowing for separate intercepts for small (<10 mg; upper intercept) and large (>10mg; lower) insects are given in the last column.

|      | RMA              |                        | Least Squares    |                        | ANCOVA           |                                    |
|------|------------------|------------------------|------------------|------------------------|------------------|------------------------------------|
|      | Slope            | Intercept <sup>†</sup> | Slope            | Intercept <sup>†</sup> | Slope            | Intercept <sup>†</sup>             |
| RMR  | 0.69 $\pm$ 0.03  | 0.54 $\pm$ 0.07        | 0.66 $\pm$ 0.03  | 0.62 $\pm$ 0.07        |                  |                                    |
| sRMR | -0.41 $\pm$ 0.03 | 0.76 $\pm$ 0.07        | -0.34 $\pm$ 0.03 | 0.62 $\pm$ 0.07        |                  |                                    |
| FMR  | 1.01 $\pm$ 0.03  | 1.49 $\pm$ 0.08        | 1.07 $\pm$ 0.03  | 1.55 $\pm$ 0.08        | 0.87 $\pm$ 0.06  | 2.11 $\pm$ 0.18<br>1.50 $\pm$ 0.18 |
| sFMR | 0.25 $\pm$ 0.03  | 1.16 $\pm$ 0.08        | 0.07 $\pm$ 0.03  | 1.55 $\pm$ 0.08        | -0.14 $\pm$ 0.06 | 2.11 $\pm$ 0.18<br>1.50 $\pm$ 0.18 |

<sup>†</sup> Values represent  $\log_{10}(\text{Intercept})$ .



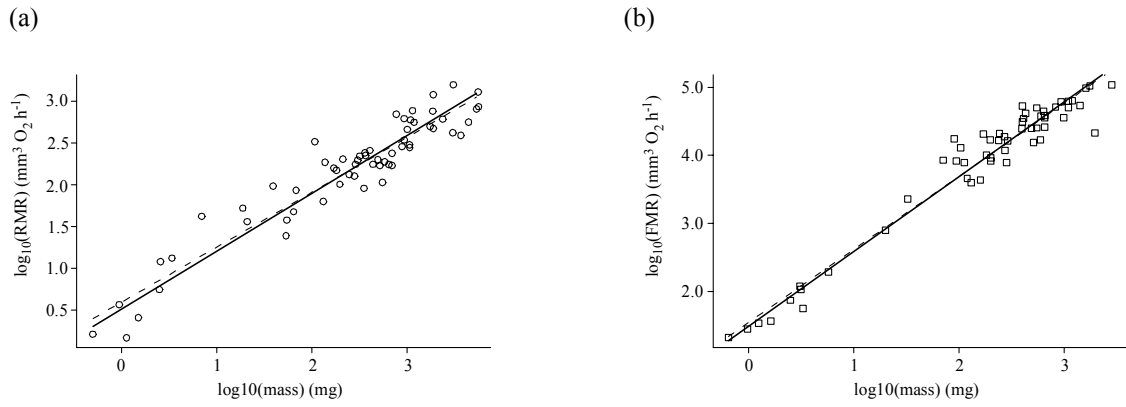

**Figure 1.** Comparison of the relationship between body mass and metabolic rate obtained using reduced major axis (solid line) or least-squares linear (dashed) regression analyses for (a) RMR and (b) FMR.

## Electronic appendix B - Effect of tethering

The FMR of several of the insects were determined during tethered flight, which, if flight force was not monitored to ensure it was the same as during free flight, may reduce the observed FMR and account for the difference between small and large insects. To ensure that tethering did not influence our results, we used estimates of the reduction in MR during tethered flight to correct the observed FMR. Direct experimental comparisons during tethered and free flight suggest that tethering may reduce sFMR by 20-50% (Bartholomew and Barnhart 1984; Morgan *et al.* 1985). We used the larger of these estimates (50%) to correct the FMR of tethered insects. As with the uncorrected data, FMR increased with increasing body mass after correcting for the effect of tethering ( $FMR = 50.49 M^{1.02}$ ;  $F_{1,54} = 1284$ ;  $p < 0.0001$ ). Partitioning of the data into two clusters ( $>10\text{mg}$  or  $<10\text{mg}$ ) was best fitted by two power law regressions with the same exponents ( $F_{1,52} = 0.44$ ;  $p = 0.51$ ), but significantly different intercepts ( $F_{1,53} = 8.37$ ;  $p = 0.0056$ ) (figure 1). After correction for tethering, the power law regression for large insects was  $FMR = 124.96 M^{0.87}$ , whereas the power law regression for small insects was  $FMR = 46.97 M^{0.87}$  (figure 1). This suggests that tethering is not sufficient to explain the extremely low sFMR in small insects.

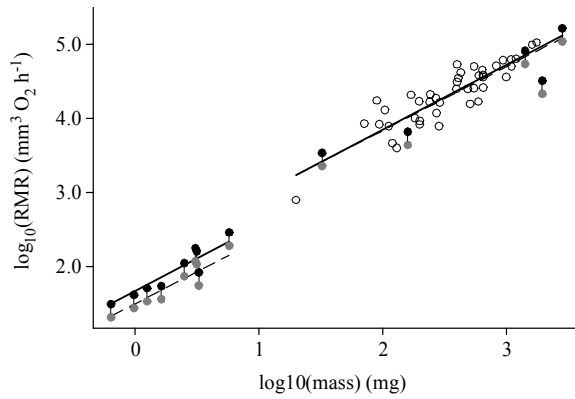

**Figure 1.** The effect of tethering upon the relationship between insect body mass and FMR. Species recorded in free flight (open circles) and tethered (grey circles), black circles show tethered species adjusted for the possible effects of tethering by 50%. The dashed line indicates the original least-squares relationship; the solid line the relationship after adjustment for tethering.

## References

- Bartholomew, G.A., Barnhardt, M.C. 1984 Tracheal gases, respiratory gas exchange, body temperature and flight in some tropical cicadas. *J. Exp. Biol.* **111**, 131-144.
- Bartholomew, G.A., Casey, T. 1978 Oxygen consumption of moths during rest, pre-flight warm-up, and flight in relation to body size and wing morphology. *J. Exp. Biol.* **76**, 11-25.
- Bartholomew, G.A., Lighton, J.R.B. 1986 Endothermy and energy metabolism of a giant tropical fly, *Pantophthalmus tabaninus* Thunberg. *J. Comp. Physiol. B* **156**, 461-467.
- Buck, J., Keister, M. 1949 Respiration and water loss in the adult blowfly, *Phormia regina*, and their relation to the physiological action of DDT. *Biol. Bull.* **97**, 64-81.
- Casey, T.M., May, M.L., Morgan, K.R. 1985 Flight energetics of euglossine bees in relation to morphology and wing stroke frequency. *J. Exp. Biol.* **116**, 271-289.
- Chadwick, L.E. 1947 The respiratory quotient of *Drosophila* in flight. *Biol. Bull.* **93**, 229-239.
- Chadwick, L.E., Gilmour, D. 1940 Respiration during flight in *Drosophila repleta* Wollaston: the oxygen consumption considered in relation to wing rate. *Physiol. Zool.* **18**, 398-410.
- Chappell, M.A. 1982 Temperature regulation of carpenter bees (*Xylocopa californica*) foraging in the Colorado Desert of Southern California. *Physiol. Zool.* **55**, 267-80.
- Chappell, M.A., Morgan, K.R. 1987 Temperature regulation, endothermy, resting metabolism, and flight energetics of tachinid flies (*Nowickia* sp.). *Physiol. Zool.* **60**, 550-559.

- Coelho, J.R., Moore, A.J. 1989 Allometry of resting metabolic rate in cockroaches. *Comp. Biochem. Physiol. A* **94**, 587-590.
- Davis, R.A., Fraenkel, G. 1940 The oxygen consumption of flies during flight. *J. Exp. Biol.* **17**, 402-407.
- Ellington, C.P., Machin, K.E., Casey, T.M. 1990 Oxygen consumption of bumblebees in forward flight. *Nature* **347**, 472-473.
- Full, R.J. 1997 Invertebrate locomotor systems. In: *The handbook of comparative physiology*. Ed. Dantzler, W., Oxford, OUP.
- Heinrich, B. 1975 Thermoregulation in bumblebees II. Energetics of warm-up and free flight. *J. Comp. Physiol.* **96**, 155-166.
- Heinrich, B., Casey, T.M. 1973 Metabolic rate and endothermy in Sphinx Moths. *J. Comp. Physiol.* **82**, 195-206.
- Hocking, B. 1953 The intrinsic range and speed of flight of insects. *Trans. Roy. Ent. Soc. (Lond.)* **104**, 223-345.
- Jongbloed, J., Wiersma, C.A.G. 1934 Der Stoffwechsel der Honigbiene während des Fliegens. *Z. Vergl. Physiol.* **21**, 519-533.
- Kavanagh, M.W. 1987 The efficiency of sound production in two cricket species, *Gryllotalpa australis* and *Teleogryllus commodus* (Orthoptera, Grylloidea). *J. Exp. Biol.* **130**, 107-119.
- Keister, M., Buck, J. 1961 Respiration of *Phormia regina* in relation to temperature and oxygen. *J. Insect Physiol.* **7**, 51-72.

- Keister, M., Buck, J. 1974 Respiration: some exogenous and endogenous effects on rate of respiration. In *The Physiology of Insecta*, vol. 6 (ed. M. Rockstein), pp.469-509 London: Academic Press.
- Krogh, A., Weis-Fogh, T. 1951 The respiratory exchange of the desert locust before, after and during flight. *J. Exp. Biol.* **28**, 344-357.
- Lehmann, F.-O., Dickinson, M.H., Staunton, J. 2000 The scaling of carbon dioxide release and respiratory water loss in flying fruit flies (*Drosophila* spp.). *J. Exp. Biol.* **203**, 1613-1624.
- May, M.L. 1979 Energy metabolism of dragonflies (Odonata: anisoptera) at rest and during endothermic warm up. *J. Exp. Biol.* **83**, 79-94.
- Morgan, K.R. 1987 Temperature regulation, energy metabolism and mate searching in rain beetles (*Plecoma* spp.), winter active, endothermic scarabs (Coleoptera). *J. Exp. Biol.* **128**,107-122.
- Morgan, K.R., Shelly, T.E., Kimsey, L.S. 1985 Body temperature regulation, energy metabolism, and foraging in light-seeking and shade-seeking robber flies. *J. Comp. Physiol. B* **155**, 561-570.
- Nicholson, S.W., Louw, G. 1982 Simultaneous measurement of evaporative water loss, oxygen consumption and thoracic temperature during flight in a carpenter bee. *J. Exp. Zool.* **222**, 287-96.
- Poláček and Kubišta 1960 Metabolism of the cockroach *Periplaneta americana* during flight. *Physiol. Bohemoslov.* **9**, 228-234.

- Rothe, U., Nachtigall, W. (1989) Flight of the honey bee IV. Respiratory quotients and metabolic rates during sitting, walking and flying. *J. Comp. Physiol. B* **158**, 739-749.
- Sokal, R.R., Rohlf, F.J. 1995 *Biometry: The principles and practice of statistics in biological research*. Third edition. New York: W.H. Freeman and Company.
- Stevens, E.D., Josephson, R.K. 1977 Metabolic rate and body temperature in singing katydids. *Physiol. Zool.* **50**, 31-42.
- Withers, P.C. 1981 The effects of ambient air pressure on oxygen consumption of resting and hovering honeybees. *J. Comp. Physiol. B* **141**, 433-437.
- Zebe, E. 1954 Über den Stoffwechsel der Lepidopteren. *Z. Vergl. Physiol.* **36**, 290-317.
